# Supplementary material for: Exploration of Mediators Associated with Myocardial Remodelling in Feline Hypertrophic Cardiomyopathy
Source: MDPI journal article supplement (doi:10.3390/ani13132112), 2023-06-26
Supplement: s1 [file s1]

**Table S3. Information on echocardiography.**

|                  | LA/Ao                                                                                                                                                                                                                                                                                           | LVFWd and IVSd                                                                                                                                                                                          | FS (%)                               |
|------------------|-------------------------------------------------------------------------------------------------------------------------------------------------------------------------------------------------------------------------------------------------------------------------------------------------|---------------------------------------------------------------------------------------------------------------------------------------------------------------------------------------------------------|--------------------------------------|
| View             | RPSAX at the level of the aortic valve                                                                                                                                                                                                                                                          | RPLAX4ch, RPLAX5ch, and RPSAX at the level of the papillary muscles                                                                                                                                     | -                                    |
| Imaging modality | 2D Imaging                                                                                                                                                                                                                                                                                      | 2D Imaging                                                                                                                                                                                              | -                                    |
| Timing           | Beginning of diastole, the first frame of aortic valve closure                                                                                                                                                                                                                                  | End-diastole, the last frame before the aortic valve opens (RPLAX5ch), the first frame after the mitral valve closes (RPLAX4ch), or when the left ventricular internal diameter was the largest (RPSAX) | -                                    |
| Measurement      | Ao: From the blood-tissue interface at the midpoint of the right aortic sinus to the commissure between the noncoronary and left coronary aortic cusps<br><br>LA: Extension of the aortic line to the blood-tissue interface of the left atrial wall, immediately lateral to the pulmonary vein | Leading edge technique avoiding the papillary muscles or false tendon attachments<br><br>Average of 3 measurements from the area that measures the maximal thickness is used                            | Calculated using (LVIDd-LVIDs)/LVIDd |

Abbreviations: RPSAX, right parasternal short axis view; RPLAX4ch, right parasternal long axis 4 chamber view; RPLAX5ch: right parasternal long axis 5 chamber view; LVIDd and LVIDs: Left ventricular internal diameter end diastole and end systole; LA: left atrium; Ao: aorta; FS: fraction shortening
