# Supplementary material for: Exploration of Mediators Associated with Myocardial Remodelling in Feline Hypertrophic Cardiomyopathy
Source: MDPI journal article supplement (doi:10.3390/ani13132112), 2023-06-26
Supplement: s1 [file s1]

**Table S4. Sequence and source of primers.**

| Gene   | Primer sequence<br>Forward (5' → 3')<br>Reverse (5' → 3') | Amplicon<br>size (bp) | Ensembl Transcript<br>Number / Accession<br>Number |
|--------|-----------------------------------------------------------|-----------------------|----------------------------------------------------|
| TGFB1  | GGAATGGCTGTCCTTTGATG<br>TGCAGTGTGTTATCTTTGCTGTC           | 120                   | AY425617                                           |
| TGFB2  | CTTGTGTTCCAGACATTCC<br>ACGTCAAATCGGACAATTC                | 96                    | XM_003999507                                       |
| ACTA2  | ACGGTTCTGGGCTCTGTAAGG<br>GTGGTGCCATATCTTTTCCATATCGT       | 230                   | XM_003993871.5                                     |
| LUM    | ACTCCCAAGTCCCTGGT<br>GAGCCAAGCTTCGTTATCTTGT               | 60                    | ENSFCAT00000003763                                 |
| LOX    | ACAAAGCGAGTTTCTGTCTTGAGG<br>GTTACGCTGACCTTTAGAATGTAGT     | 188                   | XM_023254614.1                                     |
| LOXL2  | GCCCATCTGGTTGGACAATATCTAC<br>CTGGATGTTGAGTTCTCTATGTGG     | 190                   | XM_003984692.4                                     |
| COL1A1 | AGGTCCTTCCGGAGCTTCT<br>ACCGTTGAGTCCGTCCTTC                | 85                    | ENSFCAT00000004567                                 |
| COL3A1 | CTGGCCAGCCTGGAGATA<br>CCATTCTGTCCAGGAGCAC                 | 139                   | ENSFCAT00000014744                                 |
| RPS7   | GTCCCAGAAGCCGCACTTTGAC<br>CTCTTGCCCACAATCTCGCTCG          | 81                    | AY800278                                           |
| RPL30  | CCTCGGCAGATAAATTGGACTGTC<br>TGATGGCCCTCTGGA ATTTGAC       | 111                   | AY700577                                           |
