# Supplementary material for: Exploration of Mediators Associated with Myocardial Remodelling in Feline Hypertrophic Cardiomyopathy
Source: MDPI journal article supplement (doi:10.3390/ani13132112), 2023-06-26
Supplement: s1 [file s1]

**Table S2. Clinical presentation and imaging summary.**

| Identifier        | Presenting Signs                | Murmur | Arrhythmia | Gallop | Co-morbidities                                  | CHF | Reason for euthanasia                 | Echocardiography summary                              | Cardiac POCUS           |
|-------------------|---------------------------------|--------|------------|--------|-------------------------------------------------|-----|---------------------------------------|-------------------------------------------------------|-------------------------|
| <b>Control 1</b>  | Coughing                        | Yes    | No         | No     | Solitary pulmonary carcinoma lesion             | No  | Owner request                         | Normal                                                | -                       |
| <b>Control 2</b>  | Lethargy                        | No     | No         | No     | Hepatic carcinoma                               | No  | Owner request                         | -                                                     | Normal                  |
| <b>Control 3</b>  | Lethargy, weight loss           | No     | No         | No     | IRIS II CKD (normal SBP), cognitive dysfunction | No  | Cognitive dysfunction                 | Normal                                                | -                       |
| <b>Control 4</b>  | Trauma                          | No     | No         | No     | Road trauma                                     | No  | Fractured pelvis and urethral rupture | -                                                     | Normal                  |
| <b>Control 5</b>  | Lethargy, weight loss           | No     | No         | No     | Pancreatic neoplasia                            | No  | Owner Request                         | Normal                                                | -                       |
| <b>Control 6</b>  | Normal                          | No     | No         | No     | None                                            | No  | Unsociable behaviour                  | -                                                     | Normal                  |
| <b>Control 7</b>  | Normal                          | No     | No         | No     | None                                            | No  | Aggression soiling in house           | -                                                     | Normal                  |
| <b>Control 8</b>  | Anuria                          | No     | No         | No     | Toxicity/Acute Kidney Injury                    | No  | Progressive hyperkalaemia             | -                                                     | Normal                  |
| <b>Control 9</b>  | Road Trauma                     | No     | No         | No     | None                                            | No  | Multiple trauma                       | -                                                     | Normal                  |
| <b>Control 10</b> | Normal                          | No     | No         | No     | None                                            | No  | Unsociable behaviour                  | -                                                     | Normal                  |
| <b>HCM 1</b>      | Lethargy, shallow breathing     | No     | No         | Yes    | None                                            | Yes | Financial constraints                 | Mild LAE, LVH, pleural fluid                          | -                       |
| <b>HCM 2</b>      | Anorexia weight loss murmur     | Yes    | No         | no     | Hepatic/pancreatic disease "Triaditis"          | No  | Poor prognosis                        | Mild LAE, LVH                                         | -                       |
| <b>HCM 3</b>      | Hypotension, hypothermia        | Yes    | No         | No     | None                                            | Yes | Poor prognosis                        | LAE, Severe LVH, Pleural fluid                        | -                       |
| <b>HCM 4</b>      | Lethargy, inappetence           | No     | No         | No     | None                                            | Yes | Poor prognosis                        | LAE, LVH<br>Pleural fluid                             | -                       |
| <b>HCM 5</b>      | Hind limb paresis and pain      | No     | No         | No     | None                                            | Yes | ATE, poor prognosis                   | LAE, severe LVH, minimal pleural fluid                | -                       |
| <b>HCM 6</b>      | Hind limb paresis and pain      | Yes    | Yes        | Yes    | None                                            | No  | ATE, poor prognosis                   | LAE, LVH                                              | -                       |
| <b>HCM 7</b>      | Tachypnoea, inappetence         | Yes    | No         | Yes    | None                                            | Yes | Financial constraints                 | -                                                     | LAE, LVH, pleural fluid |
| <b>HCM 8</b>      | Tachypnoea, stupor, hypotension | No     | Yes        | No     | Azotaemia due to diuresis                       | Yes | Poor prognosis                        | LAE, LVH, moderate pleural effusion, pulmonary oedema | -                       |
| <b>HCM 9</b>      | Collapse episode                | Yes    | Yes        | No     | None                                            | No  | Owner request                         | -                                                     | LAE, LVH                |
| <b>HCM 10</b>     | Hind limb paresis and pain      | No     | Yes        | No     | None                                            | No  | ATE, died in clinic                   | -                                                     | LAE, SEC, LVH           |

HCM, hypertrophic cardiomyopathy; IRIS, international renal interest society; CKD, chronic kidney disease; SBP, systolic blood pressure; CHF, congestive heart failure; POCUS, point-of-care ultrasound; ATE, aortic thromboembolism; LAE, Left atrial enlargement; LVH, Left ventricular hypertrophy; SEC, spontaneous echo contrast
