# Supplementary material for: Exploration of Mediators Associated with Myocardial Remodelling in Feline Hypertrophic Cardiomyopathy
Source: MDPI journal article supplement (doi:10.3390/ani13132112), 2023-06-26
Supplement: s1 [file s1]

**Table S1. Signalment, echocardiographic parameters, and histopathology diagnosis.**

| Identifier | Breed        | Gender | Age (yrs) | Weight (Kg) | BCS | La/Ao | La minor (mm) | IVSd (mm) | LVFWd (mm) | LV FS% | SAM | SEC yes/no | LA Thrombus yes/no | RVFW (mm) | IVS (mm) | LVFW (mm) | Histopathology |
|------------|--------------|--------|-----------|-------------|-----|-------|---------------|-----------|------------|--------|-----|------------|--------------------|-----------|----------|-----------|----------------|
| Control 1  | Maine coon   | MN     | 9.5       | 5.8         | -   | 1.5   | 15.9          | 4.6       | 4.8        | 57     | No  | No         | No                 | -         | -        | -         | Normal         |
| Control 2  | DSH          | MN     | 11.3      | 5.5         | -   | 1.4   | -             | -         | -          | -      | -   | No         | No                 | -         | -        | -         | Normal         |
| Control 3  | Russian Blue | FS     | 14        | -           | -   | 1.35  | 13.8          | 4.7       | 4.7        | 57     | No  | No         | No                 | 4.0       | 7.0      | 6.5       | Normal         |
| Control 4  | DSH          | MN     | 1.6       | 4.9         | -   | 1.33  | -             | -         | -          | -      | -   | -          | No                 | -         | -        | -         | Normal         |
| Control 5  | Russian blue | FS     | 16        | -           | -   | 1.52  | 14.2          | 5.0       | 4.8        | 60     | No  | No         | No                 | 4.0       | 7.0      | 5.5       | Normal         |
| Control 6  | DSH          | F      | <3        | -           | 5/9 | 1.41  | -             | -         | -          | -      | -   | No         | No                 | 2.0       | 5.5      | 6.0       | Normal         |
| Control 7  | DSH          | F      | <3        | -           | 5/9 | -     | -             | -         | -          | -      | -   | No         | No                 | 3.0       | 5.0      | 5.5       | Normal         |
| Control 8  | DSH          | MN     | 5.5       | 4.4         | 5/9 | 1.35  | -             | -         | -          | -      | -   | No         | No                 | 2.0       | 6.5      | 7.0       | Normal         |
| Control 9  | DSH          | F      | 5.8       |             | 5/9 | 1.27  | -             | -         | -          | -      | -   | No         | No                 | 1.0       | 4.0      | 5.5       | Normal         |
| Control 10 | DSH          | F      | <3        | -           | 5/9 | -     | -             | -         | -          | -      | -   | No         | No                 | 2.5       | 6.0      | 5.5       | Normal         |
| HCM 1      | BSH          | MN     | 13        | 4.2         | 4/9 | 1.56  | 17            | 6.5       | 6.8        | 65.4   | No  | No         | No                 | 4.0       | 8.5      | 10.0      | HCM            |
| HCM 2      | DSH          | FS     | 8.9       | 4.1         | 5/9 | 1.61  | 18            | 6.2       | 6.4        | -      | Yes | No         | No                 | 2.5       | 8.0      | 8.0       | HCM            |
| HCM 3      | DSH          | MN     | 8.4       | 6.2         | -   | 1.82  | 20.6          | 8.5       | 6.9        | 28.5   | Yes | No         | No                 | 4.0       | 12.0     | 10.0      | HCM            |
| HCM 4      | Maine coon   | MN     | 10.9      | 5.0         | 4/9 | 1.9   | 25.4          | 6.2       | 6.1        | 49     | No  | No         | No                 | -         | -        | -         | HCM            |
| HCM 5      | BSH          | MN     | 6.9       | -           | -   | 2.28  | 26            | 7.5       | 8.4        | 61     | No  | Yes        | No                 | -         | -        | -         | HCM            |
| HCM 6      | Bengal       | FS     | 15        | 3.1         | -   | 1.63  | 17            | 7.3       | 6.5        | 40.2   | Yes | Yes        | No                 | 3.0       | 10.0     | 8.0       | HCM            |
| HCM 7      | DSH          | MN     | 7         | -           | -   | 1.7   | -             | -         | -          | -      | -   | No         | No                 | 3.0       | 10.0     | 9.5       | HCM            |
| HCM 8      | Tonkinese    | FS     | 9         | 4.4         | -   | 2.26  | 16.9          | 7.3       | 7.1        | 61     | No  | No         | No                 | 2.0       | 8.0      | 7.5       | HCM            |
| HCM 9      | DSH          | FS     | 1.7       | 3.0         | -   | 2.5   | -             | -         | -          | -      | -   | No         | No                 | 2.5       | 7.0      | 7.0       | HCM            |
| HCM 10     | DSH          | MN     | 5         | 4.2         | -   | 2.6   | -             | -         | -          | -      | -   | Yes        | No                 | -         | -        | -         | HCM            |

HCM, hypertrophic cardiomyopathy; DSH, domestic shorthair; MN, male neutered; FS, female spayed; BCS, body condition score; La, left atrium; Ao, aorta; IVSd, thickness of interventricular septum in diastole; LVFWd, thickness of left ventricular freewall in diastole; LV FS%, left ventricular fraction shortening (%); SAM, systolic anterior motion; SEC, spontaneous echo contrast; RVFW, thickness of right ventricular freewall of fixed heart; IVS, thickness of interventricular septum of fixed heart; LVFW, thickness of left ventricular freewall of fixed heart
