# Supplementary material for: Exploration of Mediators Associated with Myocardial Remodelling in Feline Hypertrophic Cardiomyopathy
Source: Animals (Basel). 2023 Jun 26;13(13):2112. doi: 10.3390/ani13132112 (PMC10339868; doi:10.3390/ani13132112)
Supplement: Supplementary file 1 [file animals-13-02112-s001.zip › S1_File data.xlsx]

## Sheet: qRT-PCR
	dCT_a-SMA	dCT_LUM	dCT_LOX	dCT_LOXL2	dCT_COL1A1	dCT_COL3A1	dCT_TGFB1	dCT_TGFB2X1
Control	4.7125	4.26917	10.1475	11.5	10.4125	8.1325	8.8125
	6.97333	5.25333	11.475	14.39	11.66	9.99	10.1	10.295
	6.8575	6.3675	12.2175	14.67	12.4175	10.6275	10.0525	9.945
	5.94	4.96167	11.99	12.41	8.775	8.605	9.64	13.555
	6.805	4.58833	10.71	14.4	10.005	8.1	9.555	9.76167
		5.09583	12.2675		12.2325	12.2425	10.6175
	1.76583	4.4225	10.7975	13.3	9.7425	8.4775	9.8975	10.44
	2.9825	3.73917	9.8325	13.6	10.0425	8.7475	9.9575	11.2467
HCM
	7.38417	3.2075	10.3475	11.1	7.4975	5.2975	9.1175
	5.34917	2.9125	7.9475	9.22	5.2225	4.0875	8.3125	7.65667
	5.43917	3.6625	10.7025	13.27	8.2325	6.8625	9.2875	7.3575
	5.865	4.35	9.965	11.55	7.48	7.19	8.905
	6.51583	5.9025	11.4125	13.72	11.5225	9.9675	10.9725
	4.465	4.57667	9.71	9.44	6.3	6.075	8.38	10.425
	1.82333	2.66667	7.6	7.84	4.86	3.77	7.625	7.65667
	2.43	2.32833		9.13	6.185	5.825	7.875	8.05667

## Sheet: LOX area fraction
Control	HCM
1.65757	33.2663
9.48169	23.7433
1.36806	13.7795
1.18777	24.7871
10.6402	58.6354
	31.5805

## Sheet: Lumican area fraction
Control	HCM
1.6135	35.5712
0.9139	37.6524
1.0845	61.6924
2.7319	23.0606
0.5899

## Sheet: WB
	TGFb1/b-actin	TGFb2/b-actin	LOX/GAPDH
Control	0.84	0.43	0.947714
	0.65	0.3	1.02886
	0.6	0.79	1.07928
	1.34	0.88	0.965723
	0.73	0.76	0.783031
	0.49	0.75	0.793107
	0.67	0.77	0.845914
	0.46	0.88	0.675353
	1.34	0.77	0.576289
	1.3	0.68	0.776072
HCM	1.93	1.48	1.1728
	1.49	0.86	1.08974
	1.17	1.19	1.13684
	1.97	1.96	0.922967
	3.2	2.3	0.817778
	1.45	1.54	1.52657
	2.18	0.81	1.14877
	1.3	0.91	1.29063
	1.06	1.3	1.40111
	1.03	1.36	1.20777

## Sheet: COL. Non-COL
	Ave_COL	Ave_NonCOL	Ave_TP	Non fraction	COL fraction
Control	18.54	580.54	599.08	96.9	3.1
	17.36	559.9	577.26	96.99	3.01
	24.51	801.83	826.34	97.03	2.97
	13.3836	406.503	419.887	96.8126	3.18743
	15.6	460.92	476.52	96.73	3.27
	12.47	432.64	445.11	97.2	2.8
	14.18	498.38	512.57	97.23	2.77
	16.63	540.99	557.62	97.02	2.98
	13.54	363.8	377.34	96.41	3.59
	16.17	456.61	472.78	96.58	3.42
HCM	24.0327	679.248	703.281	96.5828	3.41723
	22.2927	640.964	663.257	96.6389	3.3611
	34.37	1200.11	1234.49	97.22	2.78
	33.72	874.44	908.16	96.29	3.71
	26.7823	825.551	852.334	96.8578	3.14223
	18.28	660.13	678.41	97.31	2.69
	21.99	780.15	802.13	97.26	2.74
	25.02	805.11	830.13	96.99	3.01
	31.26	648.19	679.45	95.4	4.6

## Sheet: Cardiomyocyte width
	Width
Control	8.675
	11.13
	10.0935
	10.501
	10.126
	13.136
	10.3305
HCM
	15.474
	16.3915
	15.317
	11.67
	17.883

## Sheet: Soluble Insoluble
	Soluble_µg/mg	Soluble%	Insoluble_µg/mg	Insoluble%	Total Collagen_µg/mg
Control
	3.8	17.6	17.9	82.4	21.7
	3.2	12.8	22	87.2	25.2
HCM
	0.5	1.6	31.2	98.4	31.7
	2.6	11.9	19.1	88.1	21.7
	1.7	4.9	32.3	95.1	34
	0.9	1.2	71.8	98.8	72.7
